# Supplementary material for: Association between Vitamin B and Obesity in Middle-Aged and Older Chinese Adults
Source: MDPI journal article supplement (doi:10.3390/nu15030483), 2023-01-17
Supplement: s1 [file s1]

Supplementary Online Content

**Supplement Table S1 Association between vitamin B and VFA-defined obesity in older adults (≥60 years)**

**Supplement Table S2 Association between vitamin B and WC-defined obesity in older adults (≥60 years)**

**Supplement Table S3 Association between vitamin B and BF%-defined obesity in older adults (≥60 years)**

**Supplement Table S4 Association between vitamin B and VFA-defined obesity in female**

**Supplement Table S5 Association between vitamin B and BF%-defined obesity in female**

**Supplement Table S6 Association between vitamin B and WC-defined obesity in female**

**Supplement Table S1 Association between vitamin B and VFA-defined obesity in older adults (≥60 years)**

|                           | OR (95% CI) <sup>a</sup> |
|---------------------------|--------------------------|
| VB <sub>1</sub>           |                          |
| Quartile 1 (<2.60 ng/mL)  | 0 (ref)                  |
| Quartile 2 (~3.16 ng/mL)  | <b>0.54 (0.31, 0.94)</b> |
| Quartile 3 (~4.38 ng/mL)  | <b>0.47 (0.27, 0.81)</b> |
| Quartile 4 (>4.38 ng/mL)  | <b>0.47 (0.27, 0.84)</b> |
| VB <sub>2</sub>           |                          |
| Quartile 1 (<2.98 ng/mL)  | 0 (ref)                  |
| Quartile 2 (~4.58 ng/mL)  | 0.71 (0.41, 1.23)        |
| Quartile 3 (~7.18 ng/mL)  | 0.98 (0.56, 1.70)        |
| Quartile 4 (>7.18 ng/mL)  | 0.58 (0.33, 1.00)        |
| VB <sub>6</sub>           |                          |
| Quartile 1 (<8.99 ng/mL)  | 0 (ref)                  |
| Quartile 2 (~12.33 ng/mL) | 0.80 (0.46, 1.39)        |
| Quartile 3 (~17.45 ng/mL) | 0.64 (0.36, 1.13)        |
| Quartile 4 (>17.45 ng/mL) | <b>0.56 (0.32, 0.98)</b> |
| VB <sub>9</sub>           |                          |
| Quartile 1 (<2.59 ng/mL)  | 0 (ref)                  |
| Quartile 2 (~4.27 ng/mL)  | 0.63 (0.36, 1.10)        |
| Quartile 3 (~6.59 ng/mL)  | 0.65 (0.37, 1.14)        |
| Quartile 4 (>6.59 ng/mL)  | <b>0.52 (0.30, 0.91)</b> |

<sup>a</sup> adjusted for sex, marital status, education, smoking status, drinking status, employment status, physical activity, family income, daily energy intake (tertiles), nutritional supplement and chronic diseases.

**Supplement Table S2 Association between vitamin B and WC-defined obesity in older adults (≥60 years)**

|                           | OR (95% CI) <sup>a</sup> |
|---------------------------|--------------------------|
| VB <sub>1</sub>           |                          |
| Quartile 1 (<2.60 ng/mL)  | 0 (ref)                  |
| Quartile 2 (~3.16 ng/mL)  | 0.96 (0.57, 1.63)        |
| Quartile 3 (~4.38 ng/mL)  | 0.74 (0.44, 1.27)        |
| Quartile 4 (>4.38 ng/mL)  | <b>0.48 (0.27, 0.85)</b> |
| VB <sub>2</sub>           |                          |
| Quartile 1 (<2.98 ng/mL)  | 0 (ref)                  |
| Quartile 2 (~4.58 ng/mL)  | 0.85 (0.50, 1.46)        |
| Quartile 3 (~7.18 ng/mL)  | 0.73 (0.42, 1.27)        |
| Quartile 4 (>7.18 ng/mL)  | <b>0.41 (0.23, 0.72)</b> |
| VB <sub>6</sub>           |                          |
| Quartile 1 (<8.99 ng/mL)  | 0 (ref)                  |
| Quartile 2 (~12.33 ng/mL) | 1.03 (0.59, 1.77)        |
| Quartile 3 (~17.45 ng/mL) | 0.94 (0.53, 1.64)        |
| Quartile 4 (>17.45 ng/mL) | 0.66 (0.38, 1.15)        |
| VB <sub>9</sub>           |                          |
| Quartile 1 (<2.59 ng/mL)  | 0 (ref)                  |
| Quartile 2 (~4.27 ng/mL)  | 0.99 (0.58, 1.71)        |
| Quartile 3 (~6.59 ng/mL)  | 0.82 (0.47, 1.42)        |
| Quartile 4 (>6.59 ng/mL)  | 0.65 (0.38, 1.14)        |

<sup>a</sup> adjusted for sex, marital status, education, smoking status, drinking status, employment status, physical activity, family income, daily energy intake (tertiles), nutritional supplement and chronic diseases.

**Supplement Table S3 Association between vitamin B and BF%-defined obesity in older adults (≥60 years)**

|                           | OR (95% CI) <sup>a</sup> |
|---------------------------|--------------------------|
| <b>VB<sub>1</sub></b>     |                          |
| Quartile 1 (<2.60 ng/mL)  | 0 (ref)                  |
| Quartile 2 (~3.16 ng/mL)  | <b>0.52 (0.31, 0.91)</b> |
| Quartile 3 (~4.38 ng/mL)  | <b>0.46 (0.27, 0.79)</b> |
| Quartile 4 (>4.38 ng/mL)  | <b>0.41 (0.23, 0.72)</b> |
| <b>VB<sub>2</sub></b>     |                          |
| Quartile 1 (<2.98 ng/mL)  | 0 (ref)                  |
| Quartile 2 (~4.58 ng/mL)  | 0.61 (0.36, 1.05)        |
| Quartile 3 (~7.18 ng/mL)  | 1.02 (0.59, 1.76)        |
| Quartile 4 (>7.18 ng/mL)  | <b>0.56 (0.32, 0.96)</b> |
| <b>VB<sub>6</sub></b>     |                          |
| Quartile 1 (<8.99 ng/mL)  | 0 (ref)                  |
| Quartile 2 (~12.33 ng/mL) | 1.02 (0.59, 1.76)        |
| Quartile 3 (~17.45 ng/mL) | 0.66 (0.38, 1.16)        |
| Quartile 4 (>17.45 ng/mL) | <b>0.57 (0.33, 0.99)</b> |
| <b>VB<sub>9</sub></b>     |                          |
| Quartile 1 (<2.59 ng/mL)  | 0 (ref)                  |
| Quartile 2 (~4.27 ng/mL)  | 0.68 (0.40, 1.17)        |
| Quartile 3 (~6.59 ng/mL)  | 0.61 (0.35, 1.06)        |
| Quartile 4 (>6.59 ng/mL)  | 0.59 (0.34, 1.02)        |

<sup>a</sup> adjusted for sex, marital status, education, smoking status, drinking status, employment status, physical activity, family income, daily energy intake (tertiles), nutritional supplement and chronic diseases.

**Supplement Table S4 Association between vitamin B and VFA-defined obesity in female**

|                           | OR (95% CI) <sup>a</sup> |
|---------------------------|--------------------------|
| VB <sub>1</sub>           |                          |
| Quartile 1 (<2.60 ng/mL)  | 0 (ref)                  |
| Quartile 2 (~3.16 ng/mL)  | 0.68 (0.45, 1.01)        |
| Quartile 3 (~4.38 ng/mL)  | <b>0.55 (0.37, 0.83)</b> |
| Quartile 4 (>4.38 ng/mL)  | <b>0.52 (0.34, 0.79)</b> |
| VB <sub>2</sub>           |                          |
| Quartile 1 (<2.98 ng/mL)  | 0 (ref)                  |
| Quartile 2 (~4.58 ng/mL)  | 0.88 (0.59, 1.32)        |
| Quartile 3 (~7.18 ng/mL)  | 1.03 (0.68, 1.54)        |
| Quartile 4 (>7.18 ng/mL)  | 0.73 (0.48, 1.10)        |
| VB <sub>6</sub>           |                          |
| Quartile 1 (<8.99 ng/mL)  | 0 (ref)                  |
| Quartile 2 (~12.33 ng/mL) | 0.85 (0.57, 1.27)        |
| Quartile 3 (~17.45 ng/mL) | 0.97 (0.65, 1.45)        |
| Quartile 4 (>17.45 ng/mL) | <b>0.62 (0.41, 0.94)</b> |
| VB <sub>9</sub>           |                          |
| Quartile 1 (<2.59 ng/mL)  | 0 (ref)                  |
| Quartile 2 (~4.27 ng/mL)  | 0.66 (0.44, 0.98)        |
| Quartile 3 (~6.59 ng/mL)  | 0.68 (0.46, 1.03)        |
| Quartile 4 (>6.59 ng/mL)  | <b>0.61 (0.40, 0.91)</b> |

<sup>a</sup> adjusted for sex, marital status, education, smoking status, drinking status, employment status, physical activity, family income, daily energy intake (tertiles), nutritional supplement and chronic diseases.

**Supplement Table S5 Association between vitamin B and BF%-defined obesity in female**

|                           | OR (95% CI) <sup>a</sup> |
|---------------------------|--------------------------|
| VB <sub>1</sub>           |                          |
| Quartile 1 (<2.60 ng/mL)  | 0 (ref)                  |
| Quartile 2 (~3.16 ng/mL)  | 0.67 (0.45, 1.01)        |
| Quartile 3 (~4.38 ng/mL)  | <b>0.55 (0.37, 0.83)</b> |
| Quartile 4 (>4.38 ng/mL)  | <b>0.49 (0.32, 0.75)</b> |
| VB <sub>2</sub>           |                          |
| Quartile 1 (<2.98 ng/mL)  | 0 (ref)                  |
| Quartile 2 (~4.58 ng/mL)  | 0.67 (0.45, 1.00)        |
| Quartile 3 (~7.18 ng/mL)  | 0.93 (0.62, 1.40)        |
| Quartile 4 (>7.18 ng/mL)  | <b>0.64 (0.42, 0.97)</b> |
| VB <sub>6</sub>           |                          |
| Quartile 1 (<8.99 ng/mL)  | 0 (ref)                  |
| Quartile 2 (~12.33 ng/mL) | 1.01 (0.70, 1.51)        |
| Quartile 3 (~17.45 ng/mL) | 0.95 (0.67, 1.43)        |
| Quartile 4 (>17.45 ng/mL) | 0.70 (0.46, 1.06)        |
| VB <sub>9</sub>           |                          |
| Quartile 1 (<2.59 ng/mL)  | 0 (ref)                  |
| Quartile 2 (~4.27 ng/mL)  | 0.81 (0.54, 1.20)        |
| Quartile 3 (~6.59 ng/mL)  | 0.82 (0.55, 1.23)        |
| Quartile 4 (>6.59 ng/mL)  | 0.69 (0.46, 1.03)        |

<sup>a</sup> adjusted for sex, marital status, education, smoking status, drinking status, employment status, physical activity, family income, daily energy intake (tertiles), nutritional supplement and chronic diseases.

**Supplement Table S6 Association between vitamin B and WC-defined obesity in female**

|                           | OR (95% CI) <sup>a</sup> |
|---------------------------|--------------------------|
| VB <sub>1</sub>           |                          |
| Quartile 1 (<2.60 ng/mL)  | 0 (ref)                  |
| Quartile 2 (~3.16 ng/mL)  | 0.91 (0.60, 1.39)        |
| Quartile 3 (~4.38 ng/mL)  | 0.74 (0.48, 1.13)        |
| Quartile 4 (>4.38 ng/mL)  | <b>0.51 (0.32, 0.80)</b> |
| VB <sub>2</sub>           |                          |
| Quartile 1 (<2.98 ng/mL)  | 0 (ref)                  |
| Quartile 2 (~4.58 ng/mL)  | 0.89 (0.58, 1.37)        |
| Quartile 3 (~7.18 ng/mL)  | 0.79 (0.51, 1.2)         |
| Quartile 4 (>7.18 ng/mL)  | 0.65 (0.42, 1.01)        |
| VB <sub>6</sub>           |                          |
| Quartile 1 (<8.99 ng/mL)  | 0 (ref)                  |
| Quartile 2 (~12.33 ng/mL) | 0.95 (0.62, 1.47)        |
| Quartile 3 (~17.45 ng/mL) | 0.97 (0.81, 1.92)        |
| Quartile 4 (>17.45 ng/mL) | 0.83 (0.53, 1.30)        |
| VB <sub>9</sub>           |                          |
| Quartile 1 (<2.59 ng/mL)  | 0 (ref)                  |
| Quartile 2 (~4.27 ng/mL)  | 0.81 (0.53, 1.24)        |
| Quartile 3 (~6.59 ng/mL)  | 0.84 (0.54, 1.29)        |
| Quartile 4 (>6.59 ng/mL)  | 0.83 (0.54, 1.27)        |

<sup>a</sup> adjusted for sex, marital status, education, smoking status, drinking status, employment status, physical activity, family income, daily energy intake (tertiles), nutritional supplement and chronic diseases.
